# Supplementary material
Source: PubMed Central journal article supplement (PMC4355167)
Supplement: NIHMS651838-supplement-1.pdf [file NIHMS651838-supplement-1.pdf]

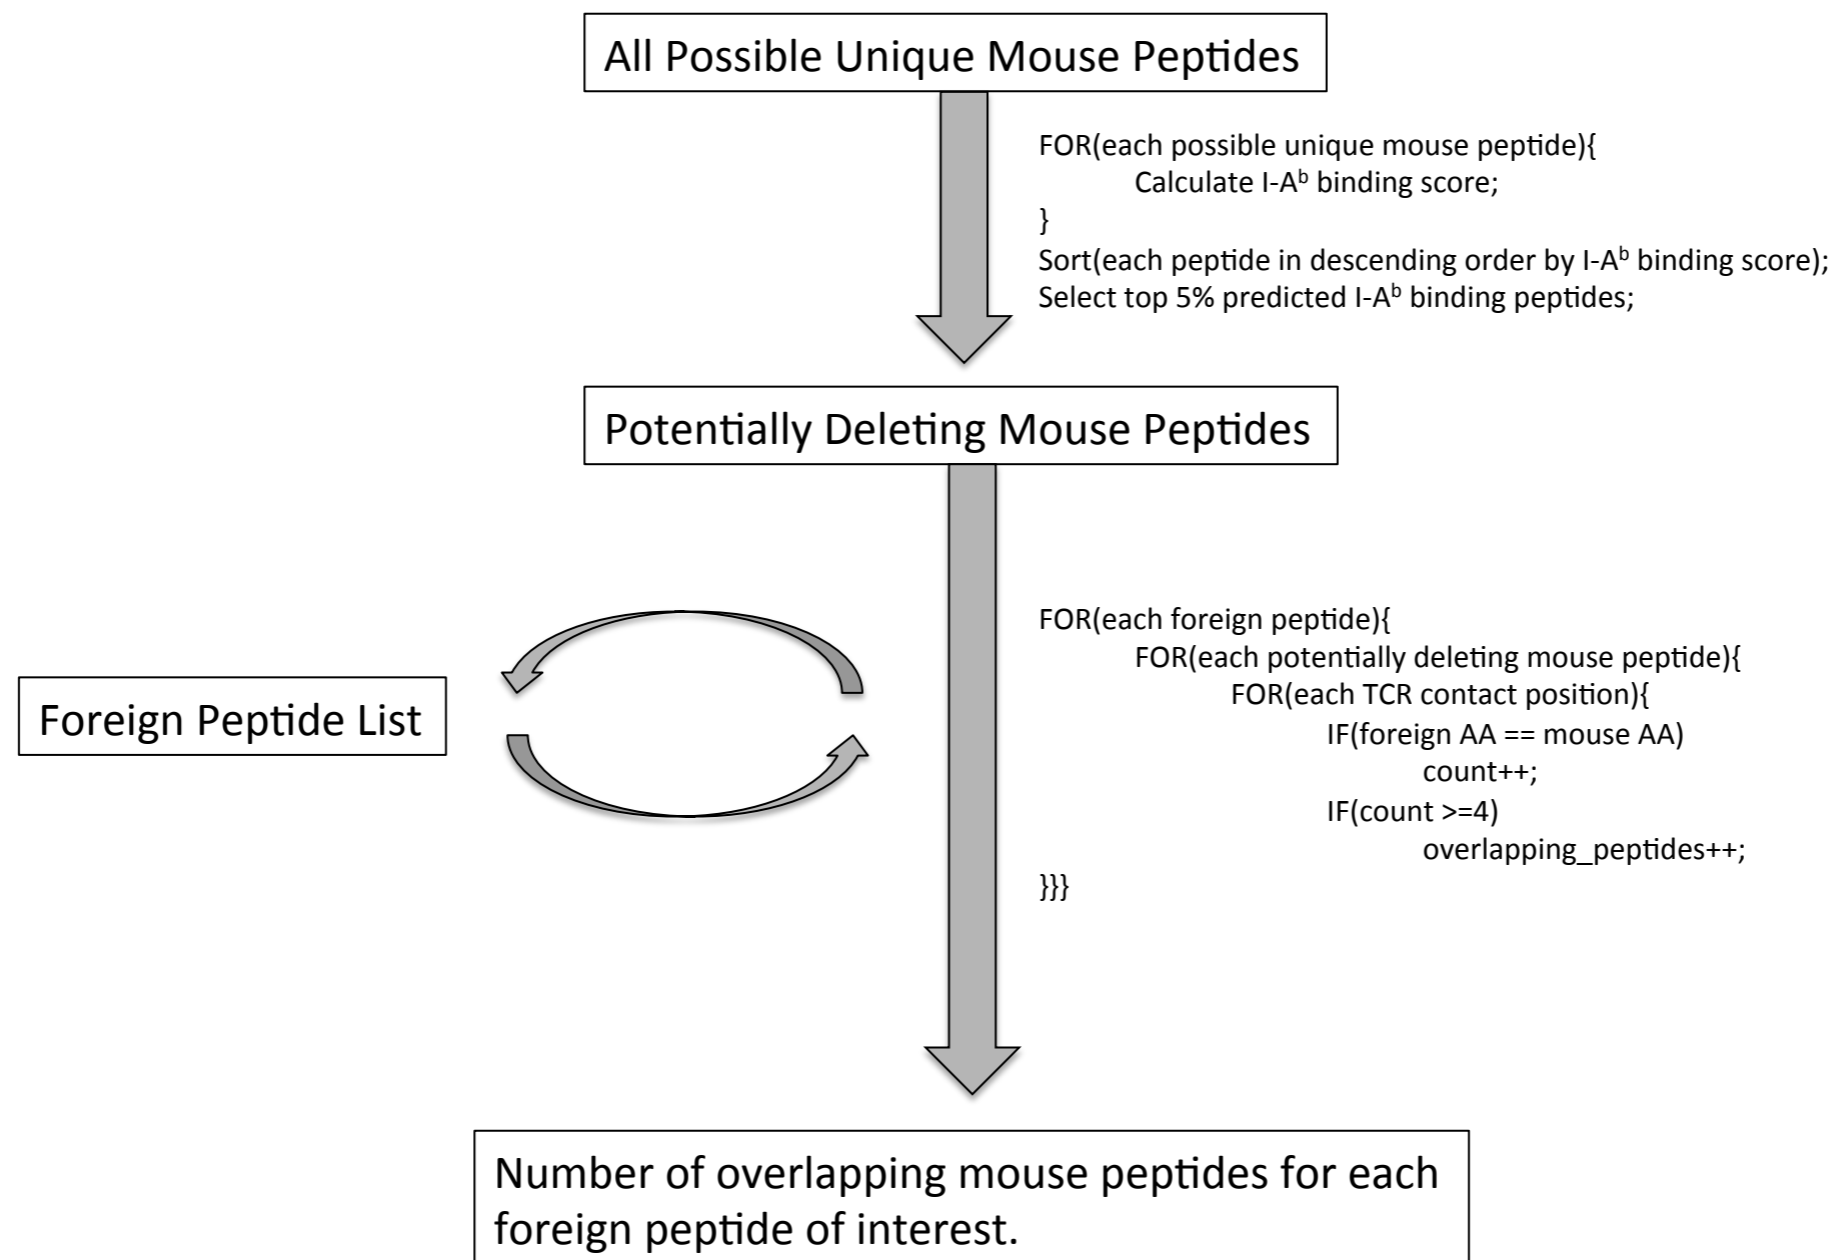

**Figure S1, related to Figure 4. *In silico* approach to identifying self peptide homologs for foreign peptides.**

Flow diagram of the computational approach taken to predict I-A<sup>b</sup> binding mouse peptides sharing 4 of 5 P2, 3, 5, 7, and 8 residues with a given foreign peptide.
